# Supplementary material for: Prevalence of left ventricular dysfunction in a UK community sample of very old people: the Newcastle 85+ study
Source: HighWire-hosted journal article supplement (doi:10.1136/heartjnl-2012-302457), 2012-08-02
Supplement: heartjnl-2012-302457-s1.pdf [file heartjnl-2012-302457-s1.pdf]

**Prevalence of left ventricular dysfunction in a  
UK community sample of very old people:  
the Newcastle 85+ Study**

**Fahad Yousaf, Joanna Collerton, Andrew Kingston, Antoinette Kenny,  
Karen Davies, Carol Jagger, Louise Robinson, Thomas BL Kirkwood,  
Bernard Keavney**

**Appendix**

**Supplementary Methods and Results**

## **SUPPLEMENTARY METHODS**

### **Sample recruitment**

This study was nested in the Newcastle 85+ Study.<sup>1,2</sup> At baseline the study cohort was socio-demographically representative of the local population, and of England and Wales, including the proportion in care homes.<sup>2,3</sup> Following baseline assessment (Phase 1: 2006-7, n=854), Newcastle 85+ Study participants were re-assessed at 18 months (Phase 2: 2007-9, n=631) and again at 36 months (Phase 3: 2009-10, n=484). Loss between phases 1 and 3 was mainly due to deaths (62.7%, 232/370) with the remainder due to drop out. All Phase 2 core study participants re-contacted after 1<sup>st</sup> May 2008 (n=397) were eligible for this cardiac study and recruitment was continued into Phase 3 for those not invited in Phase 2 (n=131). In total, 528 Newcastle 85+ Study participants were eligible for the cardiac assessment and 80.9% (427/528) took part.

### **Pre-existing diagnoses of ischaemic heart disease and cerebrovascular disease**

Ischaemic heart disease was determined from the following diagnoses/interventions recorded in the general practice medical records: angina, myocardial infarction, coronary artery bypass grafts, coronary angioplasty or coronary stent. In addition, participants without a diagnosis in the general practice records could be assigned on the basis of a 12 lead electrocardiogram with Minnesota codes commencing 1-1 or 5-1. Cerebrovascular disease was determined from the following diagnoses/interventions recorded in the general practice records: stroke, transient ischaemic attack or carotid endarterectomy.

### **Chronic disease count**

Eighteen chronic diseases were included in the disease count: hypertension; ischaemic heart disease; cerebrovascular disease; peripheral vascular disease; heart failure; atrial fibrillation; arthritis; osteoporosis; chronic obstructive pulmonary disease or asthma; other respiratory disease; diabetes mellitus; thyroid disease; cancer (within last 5 years) excluding non-melanoma skin cancer; eye disease; dementia; Parkinson's Disease; anaemia; and renal impairment. For ischaemic heart disease, diabetes, and thyroid disease, presence was defined as a diagnosis either in general practice records or from

electrocardiogram/blood test.<sup>2</sup> Atrial fibrillation was determined by 3 lead electrocardiogram, renal impairment by an estimated glomerular filtration rate of less than 30 ml/min/1.73m<sup>2</sup> (Modification of Diet in Renal Disease formula<sup>4</sup>, and anaemia by World Health Organisation haemoglobin cut points of less than 13g/dl for men and 12g/dl for women<sup>5</sup>. For all other diseases, presence was taken from record review data alone. For heart failure, atrial fibrillation, anaemia and renal impairment, disease status was determined at the time of the cardiac assessment with other diseases determined at the Newcastle 85+ Study baseline phase.

### **Other data reported**

Contemporaneous with the cardiac assessment, data on **prescribed medication** was extracted from the general practice records and directly from review of participants' medication. At the Newcastle 85+ Study baseline phase, **cognitive status** was assessed using the standardised mini-mental state examination<sup>6</sup>; **body mass index** was calculated from measured weight and height (derived from demi-span); and **ethnicity, place of residence and smoking status** (current smoker, ex-smoker, never) were obtained by self-report.

**SUPPLEMENTARY FIGURE 1: Cumulative distribution plot of LV ejection fraction measured by Simpson's biplane volumetric method, 16-segment wall motion score index, M-mode, and semi-quantitative 2-D visual estimate**

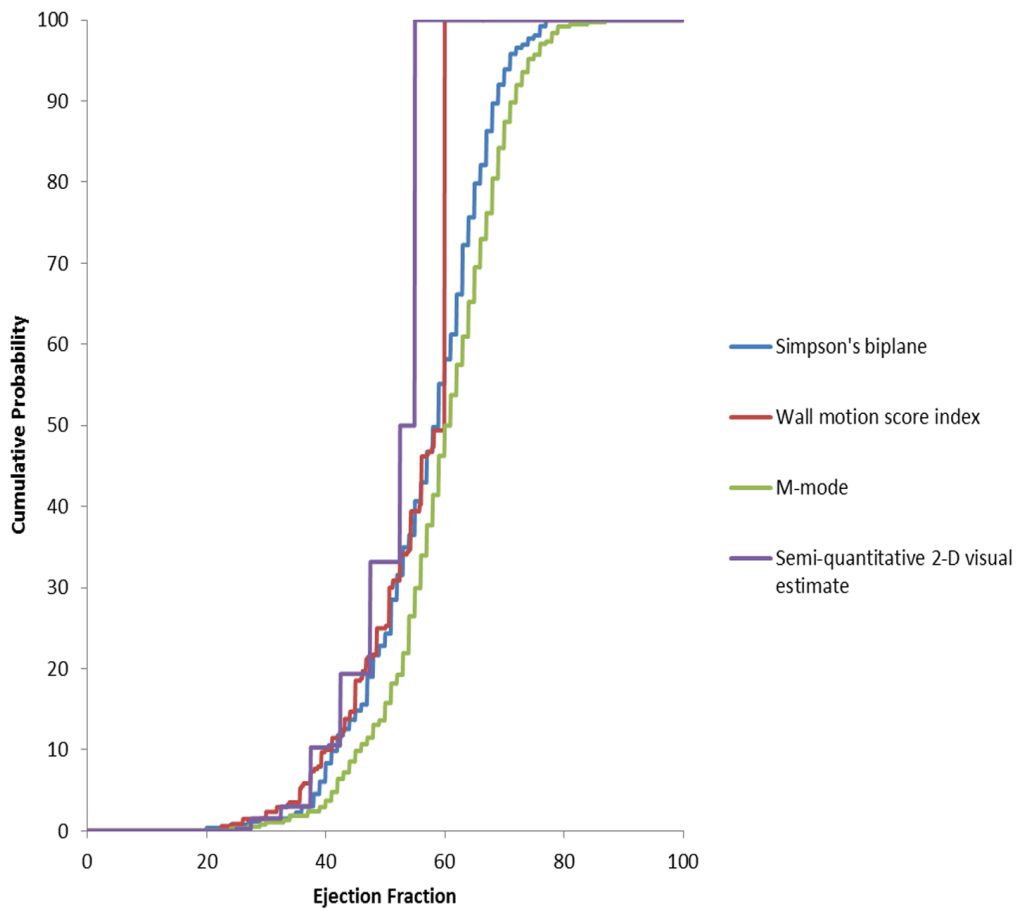

The maximum possible LVEF by wall motion score index was 60% and by semi-quantitative 2-D visual estimate greater than 55%. M-mode and Simpson's biplane are quantitative throughout the range of LVEF.

**SUPPLEMENTARY TABLE S1: Left ventricular systolic function cross-tabulated with diastolic function<sup>1</sup>- alternative systolic function grading scheme**

|                             |                      | LV SYSTOLIC DYSFUNCTION |                  |                      |                    |
|-----------------------------|----------------------|-------------------------|------------------|----------------------|--------------------|
|                             |                      | NORMAL FUNCTION         | MILD DYSFUNCTION | MODERATE DYSFUNCTION | SEVERE DYSFUNCTION |
|                             |                      | EF ≥55%                 | EF 45-54%        | EF 36-44%            | EF ≤35%            |
|                             |                      | % (n)                   | % (n)            | % (n)                | % (n)              |
| LV<br>DIASTOLIC<br>FUNCTION | NORMAL FUNCTION      | 5.6 (21)                | 3.7 (14)         | 1.9 (7)              | 0.5 (2)            |
|                             | MILD DYSFUNCTION     | 31.6 (119)              | 16.8 (63)        | 8.2 (31)             | 0.8 (3)            |
|                             | MODERATE DYSFUNCTION | 12.8 (48)               | 7.2 (27)         | 4.5 (17)             | 0.5 (2)            |
|                             | SEVERE DYSFUNCTION   | 1.6 (6)                 | 2.4 (9)          | 1.3 (5)              | 0.5 (2)            |

<sup>1</sup>Denominator for each cell is 376 i.e. the total number of participants in whom both systolic and diastolic function was quantified

**SUPPLEMENTARY TABLE S2: Comparison of Newcastle 85+ Study with previous studies of LV systolic and diastolic dysfunction in older age groups; findings shown for age group closest to Newcastle sample in those studies recruiting from a wider age range**

| <b>SYSTOLIC DYSFUNCTION</b>              |                                  |                          |                                                                                                                                                                                             |
|------------------------------------------|----------------------------------|--------------------------|---------------------------------------------------------------------------------------------------------------------------------------------------------------------------------------------|
| <b>Study</b>                             | <b>number in older age group</b> | <b>age range (years)</b> | <b>Findings</b>                                                                                                                                                                             |
| Newcastle 85+ Study                      | 376                              | 87-89                    | Ejection fraction (EF) less than 55% = 48% ; EF 50% or less = 32%; EF less than 45% = 18%; EF 40% or less = 9%                                                                              |
| Predictor Study <sup>7</sup>             | 713                              | 75-84                    | EF less than 50%: men =8%, women= 2%; EF less than 40%: men= 5%, women= 1%.                                                                                                                 |
| Cardiovascular Health Study <sup>8</sup> | 689                              | 80+                      | EF less than 45% = 6%                                                                                                                                                                       |
| Belfrail Study <sup>9</sup>              | 556                              | 80+                      | EF 50% or less=6%; EF 40% or less=2%                                                                                                                                                        |
| Helsinki Ageing Study <sup>10</sup>      | 501                              | 75-86                    | Systolic dysfunction (defined by fractional shortening of less than 0.25) = 11%                                                                                                             |
| Jerusalem Study <sup>11</sup>            | 450                              | 85                       | EF less than 55% = 44%; EF less than 45% = 14%                                                                                                                                              |
| Olmsted County Study <sup>12</sup>       | 298                              | 75+                      | EF 50% or less = 13%; EF 40% or less = 4%                                                                                                                                                   |
| Raymond et al <sup>13</sup>              | 129                              | 80-89                    | EF 40% or less: men = 17%, for women = 4%                                                                                                                                                   |
| Canberra Heart Study <sup>14</sup>       | 118                              | 80-86                    | EF 50% or less = 14%; EF 40% or less = 4%                                                                                                                                                   |
| Leiden 85-Plus Study <sup>15</sup>       | 81                               | 90                       | EF less than 50% = 9%                                                                                                                                                                       |
| Poole Study <sup>16</sup>                | 73                               | 80-84                    | Mild, moderate or severe systolic dysfunction (by qualitative assessment)= 12%                                                                                                              |
| UK ECHOES Study <sup>17</sup>            | 66                               | 85+                      | EF 50% or less = 17%; EF less than 40% = 3%                                                                                                                                                 |
| Rotterdam Study <sup>18</sup>            | 29                               | 85-94                    | EF 42.5% or less = 10%                                                                                                                                                                      |
| <b>DIASTOLIC DYSFUNCTION</b>             |                                  |                          |                                                                                                                                                                                             |
| <b>Study</b>                             | <b>number in older age group</b> | <b>age range (years)</b> | <b>Findings</b>                                                                                                                                                                             |
| Newcastle 85+ Study                      | 376                              | 87-89                    | Mild/moderate/severe diastolic dysfunction = 88%; moderate/severe dysfunction = 31%; isolated mild/moderate/severe dysfunction = 61%; isolated moderate/severe dysfunction = 20%            |
| Predictor Study                          | 713                              | 75-84                    | Mild/moderate/severe diastolic dysfunction: men=64%, women=59%; moderate/severe dysfunction: men=11%, women=7%                                                                              |
| Belfrail Study                           | 458                              | 80+                      | Isolated mild, moderate, severe diastolic dysfunction 51%; isolated severe diastolic dysfunction 3%                                                                                         |
| Jerusalem Study                          | 450                              | 85                       | Severe diastolic dysfunction = 20%                                                                                                                                                          |
| Olmsted County Study                     | 298                              | 75+                      | Mild/moderate/severe diastolic dysfunction = 71%; moderate/severe dysfunction = 18%                                                                                                         |
| Canberra Heart Study <sup>19</sup>       | 118                              | 80-86                    | Mild/moderate/severe diastolic dysfunction = 64%; moderate/severe dysfunction = 14%; isolated mild/moderate/severe diastolic dysfunction = 47%; isolated moderate/severe dysfunction = 11%. |
| Asturias Study <sup>20</sup>             | 20                               | 80+                      | Mild/moderate/severe diastolic dysfunction = 78%                                                                                                                                            |

## REFERENCES

1. Collerton J, Barrass K, Bond J, et al. The Newcastle 85+ study: biological, clinical and psychosocial factors associated with healthy ageing: study protocol. *BMC Geriatr* 2007;**7**:14.
2. Collerton J, Davies K, Jagger C, et al. Health and disease in 85 year olds: baseline findings from the Newcastle 85+ cohort study. *BMJ* 2009;**339**:b4904.
3. Office for National Statistics. 2001 Census. Standard tables for health areas; 2004.
4. Manjunath G, Sarnak MJ, Levey AS. Prediction equations to estimate glomerular filtration rate: an update. *Curr Opin Nephrol Hypertens* 2001;**10**(6):785-92.
5. de Benoist B, McClean E, Egli I, et al. Worldwide prevalence of anaemia 1993-2005. WHO global database on anaemia. Geneva: World Health Organisation 2008. <http://www.who.int/vmnis/anaemia/prevalence/en/index.html>. (accessed May 2012)
6. Molloy DW, Standish TI. A guide to the standardized Mini-Mental State Examination. *Int Psychogeriatr* 1997;**9 Suppl 1**:87-94.
7. Mureddu GF, Agabiti N, Rizzello V, et al. Prevalence of preclinical and clinical heart failure in the elderly. A population-based study in Central Italy. *Eur J Heart Fail* 2012. doi:10.1093/eurjhf/hfs052 [epub ahead of print May 4].
8. Gardin JM, Siscovick D, Anton-Culver H, et al. Sex, age, and disease affect echocardiographic left ventricular mass and systolic function in the free-living elderly. The Cardiovascular Health Study. *Circulation* 1995;**91**(6):1739-48.
9. Vaes B, Rezzoug N, Pasquet A, et al. The prevalence of cardiac dysfunction and the correlation with poor functioning among the very elderly. *Int J Cardiol* 2012;**155**:134-43.
10. Kupari M, Lindroos M, Livanainen AM, et al. Congestive heart failure in old age: prevalence, mechanisms and 4-year prognosis in the Helsinki Ageing Study. *J Intern Med* 1997;**241**(5):387-394.
11. Leibowitz D, Stessman-Lande I, Jacobs J, et al. Cardiac Structure and Function in Persons 85 Years of Age. *Am J Cardiol* 2011;**108**(3):465-470.
12. Redfield MM, Jacobsen SJ, Burnett JC, Jr., et al. Burden of systolic and diastolic ventricular dysfunction in the community: appreciating the scope of the heart failure epidemic. *JAMA* 2003;**289**(2):194-202.
13. Raymond I, Pedersen F, Steensgaard-Hansen F, et al. Prevalence of impaired left ventricular systolic function and heart failure in a middle aged and elderly urban population segment of Copenhagen. *Heart* 2003;**89**(12):1422-9.
14. Abhayaratna WP, Smith WT, Becker NG, et al. Prevalence of heart failure and systolic ventricular dysfunction in older Australians: the Canberra Heart Study. *Med J Aust* 2006;**184**(4):151-4.
15. van Bommel T, Delgado V, Bax JJ, et al. Impact of valvular heart disease on activities of daily living of nonagenarians: the Leiden 85-plus study a population based study. *BMC Geriatrics* 2010;**10**:17.

16. Morgan S, Smith H, Simpson I, et al. Prevalence and clinical characteristics of left ventricular dysfunction among elderly patients in general practice setting: cross sectional survey. *BMJ* 1999;**318**(7180):368-72.
17. Davies M, Hobbs F, Davis R, et al. Prevalence of left-ventricular systolic dysfunction and heart failure in the Echocardiographic Heart of England Screening study: a population based study. *Lancet* 2001;**358**(9280):439-44.
18. Mosterd A, Hoes AW, de Bruyne MC, et al. Prevalence of heart failure and left ventricular dysfunction in the general population; The Rotterdam Study. *Eur Heart J* 1999;**20**(6):447-55.
19. Abhayaratna WP, Marwick TH, Smith WT, et al. Characteristics of left ventricular diastolic dysfunction in the community: an echocardiographic survey. *Heart* 2006;**92**(9):1259-64.
20. Cortina A, Reguero J, Segovia E, et al. Prevalence of heart failure in Asturias (a region in the North of Spain). *Am J Cardiol* 2001;**87**(12):1417-1419.
